# Supplementary material for: Creatinine Excretion Rate and Mortality in Type 2 Diabetes and Nephropathy
Source: Oxford University Press journal article supplement (doi:10.2337/dc12-1545), 2013-01-09

SUPPLEMENTARY DATA

**Supplementary Figure 1.** Kaplan-Meier plot with sex-stratified tertiles of CER for all-cause mortality. Abbreviation: CER: creatinine excretion rate.

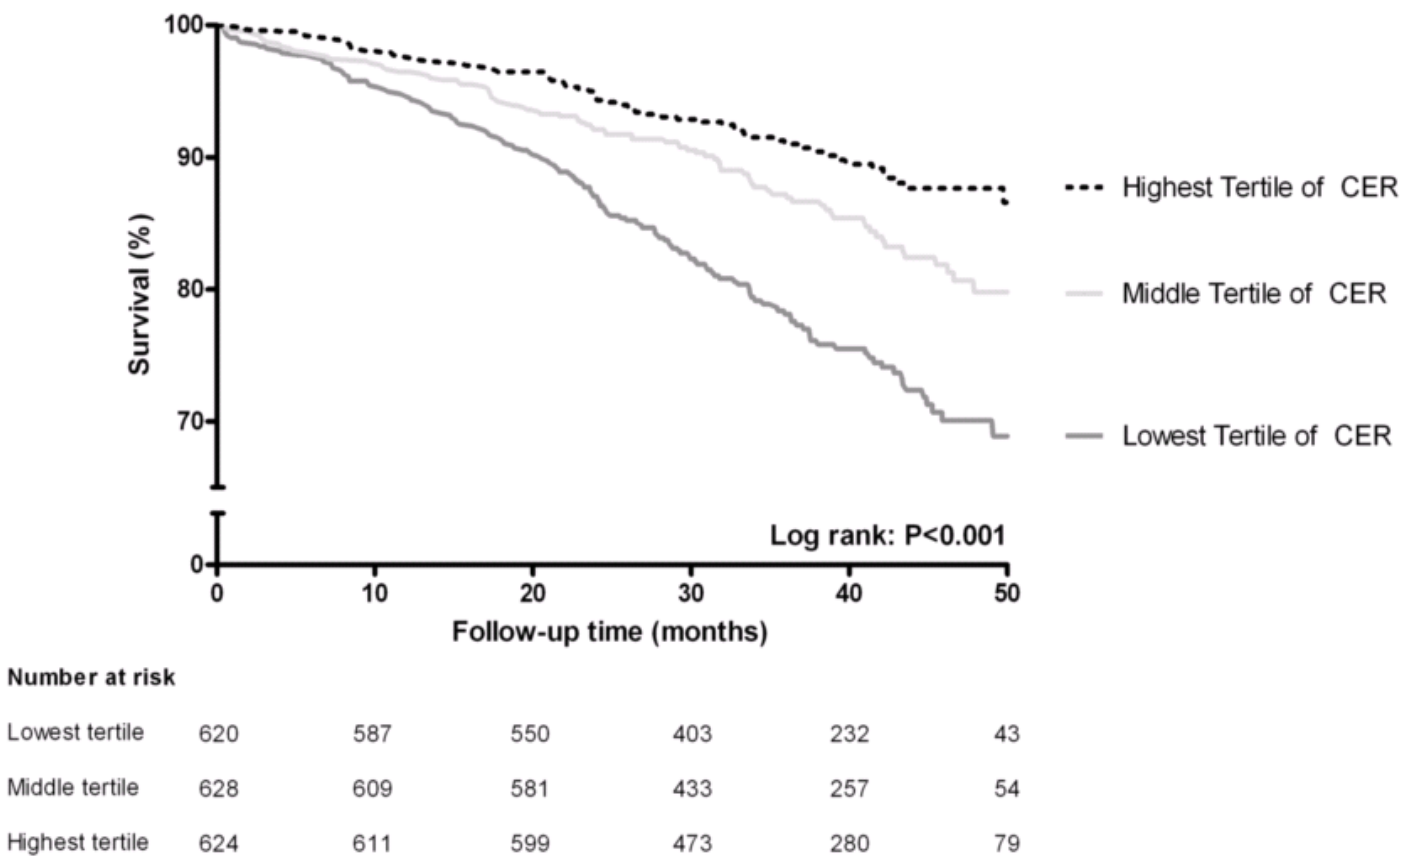

Supplement: dc121545supplementarydata.pdf [file dc121545supplementarydata.pdf]
